# Supplementary material for: Carbon Emission Prediction for Energy-Intensive Industries Based on a TCN-Transformer Hybrid Model
Source: Research Square preprint supplement (doi:10.21203/rs.3.rs-6824772/v1), 2025-06-17
Supplement: Supplementary file 1 [file 290f651e3b019cf160d7135b.xlsx]

## Sheet: Sheet1
Aluminum Electrolysis Company						Concrete Company					Steel Company
Time node	Electricity consumption (MWh)	Fuel consumption(t)	Material consumption(t)	Electrode consumption (t)	Carbon emission(tCO₂)	Carbonaceous feedstock consumption(t)	Fuel consumption(t)	Melt consumption(t)	Electrode consumption (t)	Carbon emission(tCO₂)	Transportation emissions(tCO₂)	Fuel consumption(t)	Material consumption(t)	Electricity consumption (MWh)	Carbon emission(tCO₂)
1	5427.6	1251.39	4151.54	952.19	12253.8	3145.41	4015.99	1867.99	115.93	10399	696.69	2238.59	2924.99	1132.41	7432.87
2	5807.93	1328.95	4502.54	1036.51	12886.8	3170.63	4046.96	1841.81	105.76	10391.5	765.18	2396.17	3171.33	1202.08	7959.28
3	5358.46	1216.26	4125.8	954.68	11880.6	3216.15	4196.03	1876.78	110.9	10694.3	777.55	2364.48	3011.07	1193.93	7856.6
4	5675.04	1210.14	4243.05	1000.79	12187.9	3295.34	4290.36	1966.29	123.51	10889.9	738.11	2208.34	3046.36	1095.92	7458.55
5	5578.22	1279.83	4362.06	960.62	12249.6	3050.34	3910.09	1809.67	112.83	10179.8	762.22	2273.36	3043.72	1122.47	7534.28
6	5882.41	1234.18	4663.4	1063.96	13073.5	3036.53	3855.88	1744.69	108.31	9929.76	753.36	2339.52	3231.34	1211.51	7830.29
7	5644.2	1210.15	4347.65	990.37	12396.9	3040.07	3963.52	1820.88	112.55	10223.8	677.94	2078.31	2798.98	1037.54	6864.66
8	4980.8	1145.8	3837.14	888.21	11376.7	3011.2	3788.25	1731.05	109.51	9797.22	703.2	2081.75	2913.28	1088.11	7154.41
9	5339.94	1220.92	4197.78	947.64	11781.8	2806.14	3738.34	1735.26	100.25	9359.16	758.52	2192	3093.81	1123.43	7453.19
10	5273.79	1181.68	4145.28	936.93	11582.9	2861.7	3814.85	1777.81	103.14	9729.76	742.21	2130.96	2798.19	1068.53	7066.84
11	4822.67	1065.47	3842.83	926.37	11179.2	2888.42	3685.24	1729.74	106.7	9610.97	764.45	2220.15	2810.52	1077.52	7214.22
12	5122.36	1214.15	3983.55	904.68	11586	2930.84	3891.4	1819.25	103.57	9860.28	708.89	2269.37	2980.81	1193.59	7481.06
13	5372.78	1273.67	4303.89	924.66	11973.1	3175.4	4190.42	1887.39	117.24	10472.6	803.63	2394.01	3178.06	1199.32	8048.28
14	5607.9	1356.81	4364.55	1031.78	12675.2	2976.6	3955.14	1775.79	101.59	10009	745.39	2268.85	3079.97	1159.04	7732.03
15	5787.35	1305.31	4589.02	1019.05	12879.1	3021.91	3875.72	1869.55	116.6	10132.5	779.5	2365.64	3071.97	1123.18	7811.2
16	5318.08	1290.32	4167.63	948.52	11825	3048.72	4037.38	1890.75	116.92	10414.3	787.87	2329.46	3137.57	1188.07	7772.94
17	5722.66	1335.8	4623.41	1035.57	13031.7	3010.75	4000.84	1786.19	112.34	10096.1	821.16	2475.08	3302.12	1217.63	8191.19
18	5498.25	1240.59	4280.16	979.47	12218.6	2976.33	3959.88	1838.26	117.6	10244.3	802.51	2414.67	3213.6	1204.39	8037.36
19	5368.21	1185.58	4194.82	919.48	11818.1	2824.92	3776.95	1706.7	114.23	9627.59	802.16	2296.13	3075.9	1137.06	7650.81
20	5331.58	1116.51	3889.99	979.61	11516.3	2818.41	3663.12	1631.31	107.3	9293.3	759.77	2313.99	2959.87	1109.84	7417.43
21	5429.6	1225.42	4261.27	984.31	12394.5	3058.34	3888.63	1843.93	101.78	10089.7	737.93	2234.06	3016.59	1111.44	7447.47
22	5112.32	1162.59	3981.7	920.99	11586	2911.79	3760.23	1794.15	99.74	9649.25	764.44	2286.72	3058.82	1144.89	7638.34
23	5366.66	1162.44	4081.34	923.91	11809.1	2937.4	3706.84	1743.69	106	9920.26	748.06	2175.21	2891.86	1088.37	7262.83
24	5847.33	1256.91	4388.32	1005.71	12559	2914.86	3740.59	1766.95	107.08	9722.58	798.76	2333.04	3180.55	1172.19	7835.17
25	5663.49	1160.52	4480.63	1024.38	12699.6	3115.86	4038.18	1850.08	116.84	10386.7	749.3	2309.47	3102.73	1136.53	7599.22
26	6004.2	1381.5	4708.05	1070.38	13310.7	3183.55	4136.46	1923.32	114.8	10766.3	738.84	2339.06	3199.78	1201.01	7832.26
27	5819.86	1218.54	4446.15	1038.58	13043.5	3196.55	4158.95	1864.07	115.94	10454.7	788.53	2473.5	3223.05	1244.84	8181.42
28	5614.84	1305.03	4542.9	1018.27	12952.7	3288.81	4158.32	1926.31	115.53	10845.7	771.06	2310.76	3042.91	1168.86	7674.07
29	5886.11	1336.08	4606.74	1071.93	13300.3	3102.1	4022.22	1868.02	111.01	10369.8	737.54	2383.17	3043.72	1158.65	7821.99
30	5645.73	1231.52	4252.59	983.26	12369.2	3064.82	3989.41	1813.32	105.3	10212.5	748.96	2270.9	2999.13	1154.28	7527.65
31	5222.52	1134.23	4186.97	904.55	11649.5	2969.18	3921.16	1784.62	103.95	9869.49	738.55	2213.26	3020.36	1147.46	7498.88
32	5020.59	1168.2	3909.57	881.44	11250.8	3045.13	3993.05	1874.57	107.89	10422.7	713.03	2024.35	2745.55	1021	6880.47
33	5306.87	1210.83	4150.08	936.17	11828.3	2928.9	3878.58	1756.1	102.88	9795.95	671.62	2155.96	2914.82	1087.33	7045.69
34	5080.5	1179.32	3920.06	900.71	11397.3	2837.62	3724.88	1691.71	110.31	9549.67	681.73	2171.8	2899.79	1081.37	7300.22
35	5452.55	1214.25	4411.32	941.69	12474.3	3048.96	3966.66	1836.11	108.52	10296.8	763.06	2281.03	3039.77	1123.48	7735.49
36	5515.13	1307.77	4346.27	1011.84	12539.1	2968.88	3897.27	1810.74	122.43	9933.75	782.4	2279.49	3094.53	1171.82	7665.27
37	5704.41	1221.97	4401.74	1021.62	12744.6	3300.71	4207.39	1952.31	120.86	10762.7	821.8	2423.11	3187.72	1190.2	7950.57
38	5717.21	1292.72	4419.28	1012	12792.7	3114.17	3985.08	1823.79	114.17	10295.1	797.01	2416.63	3306.46	1249.16	8197.45
39	5761.98	1258.94	4669.2	1057.49	13163.5	3142.62	4118.59	1902.26	111.78	10551.5	804.17	2351.23	3184.83	1173.53	7924.09
40	6100.08	1378.63	4820.37	1073.95	13415.6	3305.52	4248.14	1992.11	123.86	10942.1	783.87	2414.96	3258.8	1192.24	8116.53
41	6081.33	1285.6	4715.75	1059.24	13328.8	3332.44	4265.08	1915.8	117.26	10921.5	760.17	2299.14	3009.46	1192.98	7788.93
42	5492.68	1253.78	4064.86	953.84	12002.9	3187.41	4128.66	1906.55	116.13	10501.4	759.64	2200.81	2945.48	1090.02	7454.47
43	5973.83	1237.16	4607.99	1050.37	13250.8	3051.98	4043.77	1809.88	124.62	10165.3	775.14	2226	2999.21	1104.55	7571.82
44	5398.62	1110.14	4310.56	946.67	11757.8	2952.12	3809.51	1803.92	108.71	9926.66	740.51	2282.65	3044.58	1109.73	7654.95
45	5094.58	1128.78	4022.3	909.04	11408.9	2879.86	3814.16	1688.26	110.32	9506.44	768.64	2259.67	3004.67	1079.27	7567.72
46	5657.38	1290.76	4470.39	1042.58	12856.5	2956.05	3724.8	1710.04	104.3	9801.03	707.07	2240.87	3035.77	1109.89	7537.83
47	5714.24	1358.63	4532.09	1028.99	12908.2	3054.35	3916.52	1762.3	110.5	10061.8	807.78	2388.93	3281.43	1175.88	8128.47
48	6105.07	1313.42	4476.29	1035.74	13068.2	3255.55	4228.6	1939.53	127.29	10767.1	759.9	2402.37	3096.45	1181.68	7882.58
49	5695.08	1307	4450.07	1030.54	12762.2	3327.91	4285.75	1979.35	117.35	10953.1	804.38	2433.85	3332.64	1192.13	8245.75
50	6123.26	1333.03	4791.72	1105.28	13854.3	3129.82	4065.46	1863.61	124.61	10504.1	828.84	2590.57	3472.26	1269.23	8607.44
51	6003.34	1316.3	4643.67	1056.48	13345.1	3411.86	4356.51	2034.66	126.71	11197.2	807.96	2350.11	3199.76	1237.82	7941.18
52	5787.09	1216.96	4461.71	991.84	12623	3283.15	4233.17	1915.3	117.28	10917.5	809.05	2405.66	3109.93	1199.71	7952.05
53	5791.68	1265.19	4548.22	1042.25	12764.2	3277.09	4122.83	1914.46	120.28	10646.9	822.59	2548.3	3381.53	1260.87	8398.74
54	5479.71	1220.04	4180.66	988.08	12169	3207.48	4248.05	1904.7	123.48	10783.5	783.43	2295.79	3100.28	1128.64	7740.39
55	5914.24	1258.82	4420.93	1038.48	12951.1	3267.23	4174.98	1899.12	120.36	10659.3	782.13	2269.07	3150.42	1158.48	7755.94
56	5796.38	1308.86	4534.77	1012.23	12867.2	3141.83	4039.44	1881.77	107.06	10446.4	782.19	2377.09	3230.84	1179.07	7854.06
57	5141.12	1200.31	4110.99	979.59	11680.4	2928.41	3885.79	1746.87	104.69	9848.23	831.77	2389.72	3190.66	1134.62	7778.14
58	5408.49	1120.96	4314.2	1006.68	12202.2	3002.91	3944.31	1801.82	109.58	10074.2	778.09	2409.82	3202.1	1201.2	7991.17
59	5786.29	1203.59	4356.09	1038.65	12697.3	3122	4115.9	1911.08	114.57	10449.4	805.27	2419.55	3219.56	1231.19	8049.13
60	5362.13	1178.74	4334.41	985.81	12216.9	3284.77	4279.62	1943.37	122.92	10892.7	801.83	2458.76	3277.15	1210.12	8113.88
61	6148.07	1345.56	4770.85	1096.17	13768.5	3277.79	4192.49	1979.2	120.31	10856.2	790.25	2421.59	3142.43	1195.37	7995.46
62	5925.49	1298.85	4625.25	1055.8	13017.3	3315.25	4311.64	1969.03	115.72	11127.3	845.86	2500.76	3294.98	1221.98	8418.78
63	5747.79	1294.21	4556.09	1038.14	12904.6	3274.46	4295.42	1981.15	122	10918.1	828.93	2489.08	3321.52	1226.44	8362.85
64	6009.66	1251.62	4589.36	1053.88	13096.5	3332.94	4251.94	1991.59	122.12	10824.1	777.94	2416.7	3258.85	1220.34	7994.55
65	5835.75	1292.95	4521.79	1040.51	13114	3442.23	4384.02	1949.73	126.48	11243.8	846.45	2525.72	3356.83	1251.79	8433.46
66	5580	1219.2	4309.95	1005.48	12570.2	3364.51	4357.05	1984.33	128.13	11156.9	845.7	2487.93	3339.71	1205.62	8161.45
67	6120.63	1382.89	4600.2	1050.92	13303	3145.04	4150.46	1903.42	119.43	10478.4	809.48	2336.6	3004.23	1165.01	7859.1
68	5478.41	1233.64	4288.79	1015.09	12481.3	3190.22	4111.46	1905.16	119.09	10618	774.43	2330.59	2998.07	1152.89	7693.57
69	5004.64	1130.81	4108.19	930.57	11686.1	3132.09	4067.17	1875.66	113.59	10358.5	727.65	2248.38	2977.95	1095.88	7460.34
70	5609.56	1296.7	4408.09	1056.38	12652	2996.12	3938.04	1804.1	103.05	10123.5	782.67	2330.24	3156.45	1169.54	7780.1
71	5386.79	1165.27	4207.01	947.92	11982.9	3172.23	4126.4	1912.11	118.84	10608.4	821.48	2418.38	3173.99	1164.35	7943.69
72	6198.71	1287.3	4804.66	1104.59	13765.4	3296.68	4427.39	2013.38	124.36	11211.4	813.16	2370.53	3128.72	1190.55	7833.77
73	5894.96	1268.01	4520.32	1067.13	12899	3357.74	4385.58	2040.1	123.89	11139.2	857.24	2514.58	3386.89	1251.23	8482.44
74	6070.32	1311.46	4724.06	1062.48	13496.9	3566.61	4643.61	2132.07	123.44	11802.4	804.93	2461.32	3168	1247.46	8140.37
75	6142.19	1325.76	4857.34	1135.2	13895.8	3164.9	4204.76	1920.66	111.35	10614.1	792.47	2433.86	3248.06	1196.11	7975.38
76	5958.37	1343.02	4685.15	1046.67	13330.4	3536.83	4517.09	2071.97	132.64	11579.6	876.08	2566.41	3392.96	1268.25	8567.75
77	5754.71	1306.47	4451.28	1042.4	13007.3	3303.8	4392.78	1997.07	122.74	11176.1	834.09	2443.34	3322.21	1243.63	8169.33
78	5927.77	1339.55	4592.79	1064.52	13326.4	3184.51	4200.5	1932.88	122.32	10810.3	763.54	2402.35	3226.39	1183.73	8074.79
79	5529.14	1323.9	4188.19	966.14	12119.4	3212.24	4180.44	1933.79	117.59	10677.5	794.72	2334.34	3166.41	1156.43	7782.5
80	5935.4	1293.97	4418.45	1086.09	13200.5	3003.1	3843.07	1764.1	108.73	9870.72	769.68	2276.29	3024.76	1127.85	7519
81	5388.19	1073.52	4307.05	983.05	11953.7	3167.59	4035.15	1868.83	118.37	10334.1	782.92	2390.78	3215.09	1205.23	8051.05
82	5589.48	1173.4	4159.57	978.59	12052.7	3153.88	4153.67	1965.6	113.74	10574.1	751.12	2270.33	3092.28	1115.19	7702.42
83	5793.74	1254.26	4495.32	1024.57	12827.6	3371.16	4285.5	2022.94	122.51	11093.4	809.29	2473.38	3239.23	1223.92	8282.19
84	5326.48	1227.33	4195.88	934.17	12094.2	3221.82	4294.98	1924.23	115.88	10744.5	809.14	2437.05	3304.89	1242.58	8261.46
85	6088.38	1413.16	4730.07	1109.23	13691.1	3310.33	4262.11	2026.38	119.46	11057.5	793.29	2501.81	3400.62	1216.66	8287.05
86	6105.33	1363.14	4660.11	1083.84	13554.8	3435.09	4358.96	2027.61	123.11	11332.5	832.09	2459.99	3362.46	1261.72	8242.63
87	6224.19	1312.53	4994.95	1118.2	14166.6	3573.48	4669.51	2067.29	131.18	11824.6	815.71	2453.39	3292.15	1262.93	8353.51
88	6349.87	1363.6	4885.07	1113.99	13865.4	3411.44	4556.42	2054.45	125	11581.6	819.97	2454.73	3312.21	1222.31	8217.3
89	6289.88	1399.37	4959.22	1136.4	14149.6	3401.38	4376.22	1949.27	128.83	11141.1	864.3	2624.45	3519.37	1310.71	8767.42
90	5707.68	1224.18	4617.95	1032.72	12950	3416.4	4400.97	2006.17	118.77	11204	829.67	2483.34	3334.01	1272.16	8232.89
91	6087.52	1385.28	4770.08	1088.59	13498	3223.71	4222.75	1949.79	118.19	10829.1	802.74	2479.65	3316.72	1260.73	8280.04
92	5966.83	1264.33	4471.12	1077.26	12879.2	3288.11	4209.09	2013.66	117.78	10907.6	774.8	2362.08	3063.01	1160.61	7686.72
93	5688.09	1205.5	4393.4	996.66	12540.9	3121.58	4036.15	1870.9	120.97	10339.4	803.37	2365.3	3241.01	1162.12	7936.21
94	5960.64	1290.19	4519.4	1061.3	12987.3	3166.03	4068.43	1886.79	116.69	10518.7	838.27	2450.86	3281.13	1258.96	8175.76
95	5735.35	1219.4	4595.69	1063.25	12711.9	3182.7	4214.88	1947.71	122.67	10682.4	847.49	2391.81	3255.97	1218.5	7983
96	5856.35	1310.99	4598.53	1057.76	13103.9	3156.42	4130.92	1843.64	109.29	10611	788.32	2513.39	3411.21	1257.97	8406.22
97	6122.23	1398.61	4604.35	1095.82	13630.3	3460.63	4458.87	2084.06	128.26	11538.8	831.32	2474.2	3277.01	1223.97	8233.09
98	6424.88	1407.38	5136.78	1158.4	14208.5	3560.31	4551.35	2131.17	133.27	11711.3	810.98	2502.37	3306.5	1239.31	8287.11
99	6429.67	1357.91	4839.51	1133.33	14141.4	3532.2	4584.24	2061.92	129.13	11701.5	819.46	2642.97	3566.84	1277.34	8675.88
100	5779.03	1235.88	4724.84	1052.64	13053.6	3453.97	4481.24	2115.59	132.52	11562.6	869.44	2498.11	3403.16	1263.18	8483.97
101	6518.36	1470.46	5119.14	1142.9	14617.7	3338.48	4258.79	1994.72	118.69	11025.4	891.15	2558.21	3393.43	1302.02	8578.41
102	6612.24	1403.28	5068.72	1155.69	14463.5	3208.2	4330.97	1980.83	128.86	11073.8	780.65	2357.89	3101.77	1149.51	7904.42
103	6009.97	1280.55	4571.1	1067.1	12979.5	3300.11	4242.65	1971.48	130.81	10847.2	834.52	2515.87	3365.69	1237.59	8292.45
104	6248.98	1308.88	4711.94	1081.6	13497.5	3088.3	4079.91	1962.86	113.98	10526.3	854.38	2557.26	3431.96	1286.25	8559.85
105	6226.62	1303.66	4695.73	1102.05	13277.9	3180.99	4130.58	1922.75	114.94	10651.6	810.36	2341.67	3158.43	1201.33	7995.07
106	5926.86	1337.71	4478.07	1031.23	12866.5	3221.67	4258	1967.32	127.04	10888.2	826.72	2416.74	3252.54	1183.47	8047.02
107	5729.06	1281.77	4510.01	1072.42	13197	3402.97	4418.78	2059.07	134.57	11515.9	827.21	2454.76	3282.35	1204.24	8185.91
108	6478.66	1409.95	4977.9	1115.34	14134.6	3422.15	4318.05	1999.93	121.16	11252.4	801.4	2383.67	3088.02	1210.92	7927.6
109	5891.16	1275.37	4675.29	1060.21	13295.5	3484.47	4518.21	2126.82	126.35	11677.3	895.02	2559.36	3483.53	1270.79	8635.23
110	6687.16	1446.07	5158.35	1171.15	14727.6	3542.06	4575.99	2091.24	127.96	11760.7	829.76	2553.19	3402.15	1270.98	8338.73
111	6657.81	1481.48	5350.8	1203.95	15023.4	3380.43	4412.55	2031.53	117.3	11274.4	884.52	2574.62	3573.78	1282.52	8614.46
112	6331.52	1378.28	4936.48	1134.01	13999.6	3551.6	4666.04	2105.18	124.93	11775.1	870.29	2666.87	3565.1	1357.85	8908.38
113	6730.35	1473.67	5234.56	1176.26	14835.8	3488.49	4573.93	2105.62	122.78	11618.1	880.47	2493.89	3372.82	1252.02	8402.96
114	6458.1	1364.34	4983.36	1112.67	14196.7	3575.37	4706.7	2186.02	129.14	12089	868.47	2522.14	3480.43	1251.71	8500.25
115	6186.1	1388.32	4847.1	1125.05	14047.9	3352.54	4305.54	2018.74	121.29	11042.3	835.16	2499.08	3389.46	1285.01	8452.55
116	6019.96	1393.91	4585.72	1072.85	13233.2	3282.49	4242.78	1966.04	122.25	11007.5	766.73	2446.98	3292.14	1229.04	8195.94
117	5752.46	1223.51	4449.48	1045.55	12682.4	3189.61	4226.51	1943.03	126.99	10839.6	782.57	2319.02	3098.79	1202.84	7825.81
118	5806.93	1347.49	4529.75	1023.64	13092.2	3152.79	4106.46	1872.59	111.24	10566.4	777.82	2483.8	3159.76	1228.9	8073.7
119	5761.69	1342.53	4369.92	952.72	12369.8	3492.88	4478.85	2046.38	130.79	11442.9	871.68	2535.91	3502.39	1291.69	8641.88
120	6060.9	1326.49	4734.58	1060.56	13384.8	3506.68	4473.11	2094.92	126.26	11575.6	835.78	2364.65	3134.32	1190.26	7994.99
121	6525.87	1530.98	5172.6	1197.41	14631.9	3582.25	4701.02	2180.43	131.61	11987.3	863.49	2566.41	3494.97	1289.69	8594.84
122	6311.75	1344.36	5041.58	1104.25	14093.1	3484.09	4624.11	2071.17	131.64	11660.2	860.49	2615.02	3420.35	1301.21	8649.39
123	6729.86	1540.96	5111.22	1172.4	14789.7	3713.39	4838.69	2261.84	131.02	12420.8	890.97	2634.83	3542.92	1305.99	8824.15
124	6871.21	1563.38	5279.27	1274.6	15532.3	3536.81	4509.94	2112.91	128.55	11512.5	898.09	2693.11	3545.17	1353.26	8909.45
125	6175.21	1464.31	4915.88	1116.8	14030.8	3593.09	4685.67	2159.09	132.02	11926.1	838.1	2661.92	3647.43	1337.81	8971.74
126	6415.51	1371.75	5038.28	1132.67	14165.6	3664.34	4721.22	2244.59	136.19	12157.1	850.62	2535.56	3393.42	1258.43	8445.95
127	5710.45	1300.74	4472.41	1038.35	12928.1	3327.06	4282.81	1948.3	121.93	10952.8	866.75	2606.06	3502.94	1266.06	8512.47
128	6547.77	1337.6	4866.42	1131.59	13949.6	3278.68	4250.5	1924.14	132.14	10897.1	827.53	2473.01	3281.87	1255.64	8340.14
129	6328.34	1370.12	4859.06	1106.42	13867.1	3298.61	4306.54	1932.02	118.14	11029.9	853.95	2501.05	3338.64	1230.39	8294.87
130	6013.93	1228.87	4588.17	1015.5	13152.6	3266.93	4218.57	2009.75	117.42	10915.9	809.55	2444.43	3253.33	1221.81	8127.41
131	6057.2	1317.62	4666.63	1055.1	13217.6	3232.58	4207.3	1960.9	115.52	10784.8	834.23	2377.61	3274.21	1277.91	8150.54
132	6214.42	1335.02	4831.11	1109.59	13779.9	3454.68	4517.92	2072.03	123.95	11520.6	884.83	2466.33	3391.79	1240.93	8279.99
133	6153.11	1352.3	4747.68	1053.18	13874.5	3503.5	4589.27	2093.03	124.21	11581.3	857.46	2613.55	3468.75	1281.13	8598.71
134	6679.13	1540.49	5389.17	1224.59	14991.5	3669.6	4815.75	2166.75	140.42	12225.1	843.86	2681.3	3512.28	1305.27	8924.14
135	6981.89	1413.74	5419.44	1221.88	15325.5	3591.56	4738.59	2210.72	137.72	11874.2	896.8	2679.29	3647.55	1358.83	9052.19
136	6590.45	1430.46	5178.66	1149.12	14778.6	3761.17	4855.35	2262.52	135.17	12548	849.3	2698.07	3549.02	1316.49	8924.5
137	5996.29	1312.51	4770.03	1078.4	13595.6	3502.65	4592.98	2102.99	124.15	11665	879.3	2577.69	3432.42	1288.52	8640.21
138	6833.76	1518.28	5171.04	1234.63	14997	3386.09	4514.99	2101.38	129.44	11553.4	928.85	2699.16	3636.77	1347.21	8961.19
139	6522.11	1470.84	4857.37	1146.97	14139.6	3529.87	4650.67	2110.36	125.32	11644.1	892.77	2637.44	3471.39	1278.45	8753.77
140	6088.87	1366.96	4760.29	1106.9	13796.1	3268.18	4190.2	1959.31	122.49	10847.7	834.95	2447.26	3288.77	1243.56	8269.39
141	5819.97	1254.23	4537.68	1021.41	12794.2	3405.39	4333.13	1995.57	124.42	11218.2	797.41	2464.29	3255.75	1226.39	8135.31
142	6150.2	1418.58	4908.1	1045.98	13623.8	3366.89	4497.59	2103.79	120.12	11609.1	876.01	2479.65	3393.8	1228.99	8366.24
143	6340.92	1413.4	4947.58	1112.79	13921.7	3358.86	4151.73	2021.66	127.83	10917.8	889.18	2571.86	3510.46	1297.67	8703.46
144	6434.24	1424.41	4969.34	1160.15	14252.3	3506.03	4538.81	2147.33	137.74	11705.4	873.77	2573.48	3454.9	1263.37	8666.55
145	6798.64	1555.03	5298.55	1181.95	14988.8	3682.72	4691.95	2230.83	130.34	12128	901.25	2678.01	3570.92	1375.71	8961.31
146	6554.79	1454.5	5188.21	1171.26	14497.8	3698.67	4869.87	2228.82	135.2	12467.6	894.53	2678.5	3508.95	1344.22	8917.39
147	6759.75	1445.05	5111.11	1165.04	14757.3	3603.19	4669.36	2117.52	132.65	11928.9	920.43	2704.2	3598.51	1360.1	9091.25
148	6590.37	1516.64	5181.54	1175.22	14539.6	3508.93	4710.19	2126.86	131.88	11836.9	911.54	2802.96	3674.77	1387.04	9268.72
149	6526.78	1475.32	5166.92	1140.26	14585	3637.02	4808.09	2198.86	137.57	12206.6	918.34	2648.16	3513.36	1342.94	8802.07
150	5865.86	1315.46	4656.81	1086.43	13487.4	3643.29	4607.9	2172.86	140.83	11889.1	876.67	2597.75	3590.8	1307.42	8728.66
151	6598.04	1404.8	5151.14	1139.11	14578.2	3479.92	4488.89	2041.75	126.99	11625.1	875.08	2606.9	3406.53	1296.73	8600.76
152	6297.98	1405.73	5116.25	1097.92	14115.6	3449.97	4498.26	2110.65	122.19	11470.9	838.85	2583.91	3383.98	1304.91	8496.94
153	6287.33	1431.09	4944.28	1124.71	14177.7	3363.6	4261.43	1992.54	115.16	11096	821.14	2432.33	3144.43	1210.72	8117.62
154	6143.65	1365.05	4912.53	1097.82	13799.2	3450.83	4551.87	2045.79	122.15	11436.7	749.44	2413	3255.96	1187.87	8064.82
155	6460.81	1396.32	4965.06	1141.55	14241.7	3497.39	4597.76	2064.46	127.85	11637.9	806.65	2450.61	3259.56	1235.42	8346.07
156	6535.66	1417.72	5028.07	1112.64	14150.1	3490.31	4494.96	2035.78	136.42	11585.7	872.57	2607.85	3448.11	1338.61	8733.59
157	7213.08	1654.68	5434.35	1245.3	15685.4	3924.06	4890.64	2321.45	137.77	12759.7	873.02	2709.49	3676.43	1360.94	9060.77
158	6694.75	1467.23	5043.26	1158.12	14492.6	3755.24	4952.51	2256.73	138.9	12525.2	956.35	2693.46	3476.22	1333	8953.67
159	6574.18	1478.6	5109.43	1183.99	14515.4	3635.83	4710.39	2137.97	132.94	12092.6	895.84	2807.58	3754.98	1425.79	9375.45
160	6724.62	1500.57	5371.48	1226.44	15052	3816.02	4968.08	2225.54	144.32	12580	911.76	2716.67	3652.52	1374.64	9031.17
161	6709.98	1519.46	5354	1200.75	14982.2	3616.5	4564.24	2133.29	143.62	11907.6	936.8	2732.24	3657.9	1333.6	8954.06
162	7073.97	1578.44	5493.18	1291.36	15773.1	3703.32	4722.62	2243.57	131.39	12186.1	888.15	2612.46	3458.48	1294.74	8761.21
163	6730.69	1518.25	5268.02	1184.34	14823.4	3639.82	4698.82	2160.78	130.08	12047.6	859.92	2588.31	3439.52	1270.11	8676.81
164	6441.22	1426.28	5089.03	1192.21	14349.6	3335.51	4397.95	1983.65	129.2	11270.8	854.31	2565.05	3562.66	1266.29	8681.09
165	6106.25	1385.74	4879.32	1112.89	13559.1	3587.04	4555.71	2105.65	132.54	11739	880.14	2589.68	3452	1289.67	8633.13
166	6138.86	1364.19	4728.61	1078.48	13590.5	3446.39	4571.06	2087.17	137.28	11640.8	816.04	2537.46	3307.39	1236.21	8360.51
167	6213.25	1418.16	4785.66	1091.87	13805.3	3596.09	4605.8	2069.48	134.33	11946.6	892.49	2633.89	3546.02	1380.38	8954.73
168	6563.66	1434.94	5353.45	1194.07	14987.2	3725.54	4875.31	2251.8	135.91	12519	875.38	2554.32	3383.77	1288.32	8580.99
169	7057.96	1538.75	5361.76	1267	15565.2	3680.35	4793.8	2202.82	137.99	12276.4	898.89	2720.83	3604.35	1321.03	9065.85
170	7172.62	1671.46	5475.2	1244.71	15758	3705.22	4825.41	2236.13	140.92	12306.9	912.68	2756.98	3696.38	1394.11	9104.93
171	6763.65	1579.82	5165.64	1205.85	14924.9	3712.8	4845.51	2275.43	139.77	12333.1	891.42	2708.55	3640.47	1351.76	8990.2
172	6576.74	1590.02	5142.39	1174.12	14601	3703.36	4736.19	2245.69	137.71	12288.3	890.23	2753.2	3599.2	1385.82	9144.78
173	6632.43	1538.25	5241.72	1237.65	15138.8	3762.61	4730.77	2210.77	140.93	12326.9	919.91	2663.82	3571.46	1348.92	8901.84
174	7006.54	1489.71	5200.79	1183.4	15032.3	3678.85	4822.8	2163.23	140.07	12202.4	926.28	2688.83	3545.72	1343.12	8914.58
175	6463.67	1503.89	5154.28	1161.25	14601.5	3570.14	4670.49	2225.14	138.17	11933	875.14	2679.61	3571.37	1335.06	8830.62
176	6553.79	1441.22	5265.65	1157.18	14665.3	3613.11	4609.48	2146.5	134.31	11915.1	886.82	2629.1	3566.01	1344.96	8934.58
177	6537.39	1513.38	5167.96	1191.52	14609.8	3528.75	4603.08	2089.12	126.81	11603.9	861.7	2620.3	3483.17	1277.09	8661.48
178	6831.07	1440.54	5269.82	1234.27	14905.8	3581.81	4725.97	2177.82	133.87	12103	865.26	2552.42	3399.25	1285.03	8517.95
179	6700.3	1527.69	5207.19	1204.83	14890.8	3555.08	4649.5	2124.65	135.51	11770.6	844.54	2585.6	3359.32	1321.23	8671.68
180	6285.03	1316.12	4925.61	1137.01	13989.8	3902.86	5040.64	2320.56	137.99	12916	890.59	2605.11	3573.55	1335	8928
181	6702.6	1497.36	5213.57	1183.19	14957.4	3794.41	5051.24	2266.58	141.41	12687.7	923.44	2709.2	3603.89	1386.33	9168.69
182	6905.32	1630.1	5358.21	1257.84	15405.5	3782.79	4933.85	2220.25	134.72	12425.9	971.22	2916.46	3858.05	1441.15	9551.73
183	7477.04	1561.21	5684.09	1304.13	16519.6	3722.62	4834.76	2236.19	136.86	12428.7	888.39	2853.06	3797.64	1473.17	9579.07
184	6842.85	1536.59	5288.2	1213.99	15169.6	3853.35	5051.4	2292.69	147.5	12827.8	928.89	2723.86	3644.96	1373.15	9188.02
185	6817.14	1489.58	5294.98	1198.16	15142.2	3722.97	4881.12	2216.55	137.72	12433	912.67	2698.39	3615.66	1350.2	9040.27
186	6847.48	1569.02	5286	1184.77	14885.6	3739.88	4929.47	2246.75	137.34	12464.2	874.05	2524.22	3424.33	1270.95	8488.59
187	6759.85	1412.69	5282.19	1215.22	15051.1	3598.74	4687.12	2177.91	126.76	12142	860.86	2625.8	3487.6	1308.98	8740.22
188	6632.68	1363.18	4998.36	1173.2	14319.6	3480.94	4634.41	2168.24	133.48	11795.1	841.5	2608.88	3499.94	1236.23	8544.58
189	6454.73	1572.22	4973.04	1140.58	14538.5	3512.57	4536.35	1989.74	129.68	11496	892.97	2571.11	3534.05	1281.5	8629.04
190	6117.55	1355.94	4685.22	1087.25	13785.1	3374.88	4343.45	2078	135.8	11362.5	842.77	2650.18	3613.18	1328.77	8818.51
191	6883.28	1467.68	5160.28	1184.28	14745.4	3520.16	4568.59	2173.27	128.99	11866	929.27	2631.21	3542.46	1332.65	8885.44
192	7014.45	1538.04	5425.37	1245.58	15585.5	3665.94	4775.74	2189.04	138.67	12506.9	963.3	2743.81	3523.5	1333.11	8994.01
193	7202.7	1608.61	5532.25	1269.01	15783.5	3788.71	4945.08	2278.28	141.1	12714.2	940.93	2792.65	3776.97	1380.19	9289.92
194	6904.61	1540.67	5409.44	1234.11	15603.8	3684.86	4895	2231.53	144.94	12459.3	953.81	2767.92	3713.02	1393.08	9334.58
195	7310.29	1610.87	5707.22	1287.17	16229.4	3951.27	5126.38	2289.13	142	12952	906.7	2858.95	3777.67	1399.88	9439.4
196	7239.18	1566.3	5568.77	1270.87	16140.8	3924.98	5053.66	2307.41	143.83	12948.6	854	2650.08	3516.85	1296.78	8713.6
197	7058.38	1579.84	5580.05	1265.24	15702.8	3687.93	4911.52	2195.95	139.27	12384.8	946.06	2763.69	3598.23	1368.63	9196.14
198	7095.11	1577.57	5529.57	1232.33	15542.8	3823.93	4784.98	2292.87	137.84	12446.1	916.83	2674.17	3712.59	1379.58	9077.83
199	6939.85	1599.1	5143.97	1247.09	15424.8	3689.51	4660.14	2218.21	131.61	12167.5	883.64	2718.08	3596.45	1352.59	8881.75
200	6455.97	1460.26	4994.6	1159.34	14315.4	3474.24	4530.62	2130.48	128.84	11624.1	885.48	2648.28	3536.25	1338.16	8796.6
201	6515.08	1447.15	4888.47	1148.07	14295	3502.22	4702.06	2182.97	137.45	12007.3	906.74	2717.31	3620.81	1349.63	8940.66
202	6768.88	1496.93	5243.97	1224.85	15004.8	3732.2	4731.1	2150.47	128.35	12135.2	864.73	2599.64	3516.08	1293.92	8720.57
203	7329.63	1643.99	5390.16	1275.31	15754.9	3686.89	4761.84	2229.75	137.89	12474.9	938.29	2805.08	3761.9	1427.72	9390.14
204	6900.2	1449.26	5108.22	1238.35	15143.9	3749.03	4954.84	2303.59	136.38	12716.1	922.86	2774.61	3679.68	1379.36	9237.66
205	6822.49	1490.64	5312.98	1199.24	15182.1	3756.91	4765.59	2192.94	142.23	12386.7	908.57	2838.02	3702.54	1402.77	9348.74
206	7544.48	1629.15	5811.75	1342.34	16531.3	3908.09	4987.13	2307.69	132.1	12701.7	949.94	2829.83	3781.75	1439.54	9418.48
207	7233.1	1543.07	5549.77	1273.68	15839.1	4016.72	5168.09	2369.6	142.46	13204.5	993.36	2807.1	3811.14	1424.08	9482.7
208	7058.35	1583.23	5649.69	1255.17	15716.5	3963.7	5076.49	2353.44	146.39	13137.1	970.97	2790.88	3764.86	1396.46	9276.75
209	6532.38	1437.64	5135.04	1196.5	14509.6	3910.14	5026.57	2353.14	150.33	12954.5	896.19	2848.17	3742.42	1371.39	9330.96
210	7015.26	1564	5332.59	1211.98	15331.8	4145.88	5292.31	2480.38	150.44	13705.8	939.84	2778.7	3659.63	1398.1	9255.74
211	6922.24	1484.53	5308.51	1232.35	15397.9	3771.74	4860.66	2234	134.41	12471.3	933.48	2753.65	3587.55	1355.29	9165.91
212	6361.96	1442.39	4986.29	1153.77	14374	3748.54	4906.24	2277.16	146.44	12457.7	895.35	2678.96	3616.07	1378.66	9056.13
213	6855.31	1594.39	5293.27	1214.76	15239.9	3705.03	4761.83	2188.08	128.46	12336.2	860.4	2611.42	3536.64	1323.06	8845.02
214	6405.92	1389.72	5059.23	1164.66	14354.8	3691.22	4827.04	2234.71	124.44	12312.4	832.68	2577.96	3457.89	1253.82	8656.98
215	6774.65	1451	5138.87	1214.55	14779.7	3631.47	4733.6	2214.77	136.46	12205.4	880.5	2665.06	3489.95	1330.27	8916.18
216	6800.12	1503.64	5235.33	1214.06	14903.1	3822.08	4943.66	2290.7	138.04	12777.7	960.99	2859.85	3862.7	1423.81	9522.44
217	6983.4	1507.75	5433.05	1211.79	15431.2	3747.73	4954.73	2299.05	134.79	12718.1	958.97	2893.74	3905.32	1454.09	9629.21
218	6760.19	1501.38	5383.64	1212.35	15352.6	3914.66	5042.41	2313.62	147.22	13062	948.1	2938.18	3812.33	1458.47	9633.73
219	7161.89	1571.81	5565.42	1299.44	16003.3	3876.77	5063.53	2377.51	144.82	13054.4	913.55	2836.08	3819.4	1410.61	9447.74
220	7164.75	1574.45	5592.78	1252.47	15887.4	3903.13	5071.56	2362.82	141.91	13157.6	964.82	2900.09	3871.86	1454.34	9560.54
221	7047.41	1530.03	5587.92	1255.75	15720.2	4100.52	5419.55	2440.31	143.69	13644.4	946.55	2758.48	3681.47	1316.49	9198.87
222	7062.6	1712.24	5316.08	1232.26	15667.5	3697.63	4736.29	2216.64	137.9	12139.8	895.79	2800.35	3628.42	1364.16	9189.61
223	6339.3	1393.39	5194.62	1113.84	14431.1	3833.5	4900.81	2256.93	142.47	12655.9	921.31	2674.18	3721.05	1342.9	9100.96
224	7131.1	1515.86	5281.37	1187.26	15290.8	3472.13	4606.14	2078.72	129.12	11783.2	849.8	2672.4	3606.19	1320.1	8967.86
225	6990.53	1614.91	5224.85	1206.88	15258.8	3577.94	4697.17	2123.82	141.88	12058.4	902.7	2786.89	3663.98	1397.89	9191.32
226	6717.11	1498.51	5300.42	1210.54	14968.2	3815.73	4900.48	2285.04	133.18	12593.7	893.88	2621.79	3541.22	1330.05	8756.45
227	7191.52	1559.49	5463.98	1247.48	15556.1	3701.49	4893.73	2206.06	129.53	12469.3	869.75	2721.02	3671.88	1331.02	8976.91
228	6906.08	1454.88	5446.41	1248.12	15531.6	3704.02	4864.78	2280.45	132.68	12376.7	887.4	2719.07	3585.17	1377.32	9025.06
229	7696.64	1735.73	5986.98	1366.43	16975.2	3887.62	4998.78	2256.92	141.51	12885.4	965.7	2819.14	3755.58	1397.41	9302.53
230	7543.14	1706.53	5939.33	1344.74	16827.7	4007.33	5231.1	2478.53	149.57	13486.9	950.14	2923.78	3971.01	1444.26	9684.62
231	7702.71	1676.85	5912.91	1365.02	16779.7	3943.48	5107.29	2369.89	143.23	13130.9	916.64	2834.18	3696.14	1393.13	9379.91
232	7100.66	1511.38	5468.4	1251.82	15612.3	3951.02	5090.6	2399.73	148.59	13348	995.45	2987.95	3896.77	1456.02	9810.58
233	7385.35	1581.12	5379.91	1289.54	16079.5	3910.05	5038.57	2344.11	137.99	13113.7	998.93	2879.79	3770.36	1434.55	9500.64
234	7284.03	1607.99	5696.44	1322.99	16127	3809.15	5003.61	2289.79	146.42	12654.5	935.38	2853.94	3757.59	1425.07	9413.76
235	6971.37	1644.41	5626.52	1270	15954.1	3909.24	5247.09	2382.64	145.26	13243.2	950.67	2794.97	3715.31	1401.95	9314.52
236	6851.87	1536.84	5278.89	1223.77	15233.3	3799.77	4904.34	2302.39	144.27	12607.2	938.98	2698.55	3636.38	1317	9053.36
237	7306.19	1509.69	5616.08	1299.92	16185.2	3521.95	4608.39	2117.07	130.88	11742.5	938.79	2772.16	3681.58	1401.9	9306.5
238	6925.54	1469.28	5461.3	1266.88	15497.3	3763.98	4880	2249.64	139.49	12472.9	903.38	2752.93	3609.4	1376.51	9101.32
239	6742.63	1488.54	5270.09	1237.71	15182	3729.4	4990.52	2221.36	139.26	12401.5	914.97	2737.49	3762.59	1391.94	9368.81
240	7089.95	1598.31	5300.74	1215.14	15464.1	3986.28	5167.21	2357.32	146.4	13105.7	900.39	2768.84	3751.82	1404.89	9360.18
